# Supplementary material for: A Homozygous Synonymous Variant Likely Cause of Severe Ciliopathy Phenotype
Source: MDPI journal article supplement (doi:10.3390/genes12060945), 2021-06-21
Supplement: s1 [file s1]

## Splice site predictions for 2 sequences with donor score cutoff 0.40, acceptor score cutoff 0.40 (exon/intron boundary shown in larger font):

### Donor site predictions for NM\_001134831.2 :

| Start | End  | Score | Exon    | Intron           |
|-------|------|-------|---------|------------------|
| 596   | 610  | 0.99  | tgatgat | <b>gt</b> aagtgc |
| 861   | 875  | 0.62  | cagaaaa | <b>gt</b> gagaag |
| 1101  | 1115 | 0.42  | gaaacaa | <b>gt</b> acattg |
| 1448  | 1462 | 0.89  | cccaatg | <b>gt</b> aaaaat |
| 1942  | 1956 | 0.88  | caacact | <b>gt</b> acgtaa |
| 1952  | 1966 | 0.79  | cgtaact | <b>gt</b> aagagg |
| 2025  | 2039 | 0.97  | gaaaaag | <b>gt</b> aaacca |
| 3317  | 3331 | 0.50  | cacagag | <b>gt</b> gatacg |
| 3500  | 3514 | 0.90  | ccatcag | <b>gt</b> agatac |
| 4486  | 4500 | 0.89  | acctaag | <b>gt</b> caggag |
| 4821  | 4835 | 0.60  | catatag | <b>gt</b> aacttc |
| 5341  | 5355 | 0.69  | aaaattg | <b>gt</b> aaacat |
| 5497  | 5511 | 0.59  | gtgtcag | <b>gt</b> acagct |
| 5866  | 5880 | 0.98  | tgacaaa | <b>gt</b> aagact |

### Acceptor site predictions for NM\_001134831.2 :

| Start | End  | Score | Intron               | Exon                             |
|-------|------|-------|----------------------|----------------------------------|
| 3     | 43   | 0.86  | agagccgcggccttgctttc | <b>ag</b> gacacgggtcgctggcgggt   |
| 140   | 180  | 0.68  | gttctgcgtacccctctcc  | <b>ag</b> tgtcaacctggggctgaatc   |
| 318   | 358  | 0.57  | gtcaatgctttgcattctc  | <b>ag</b> tcctctgcataaagctgaga   |
| 1003  | 1043 | 0.97  | agttgacttactttccctc  | <b>ag</b> atactttattccatgatgac   |
| 1162  | 1202 | 0.90  | cagttagatcagttttcttc | <b>ag</b> attctcatcaagatgatgaa   |
| 2001  | 2041 | 0.77  | cgctctatgatggctcttc  | <b>ag</b> gaggaaaaaggtaaaccagt   |
| 2605  | 2645 | 0.67  | cactttgttttgatactga  | <b>ag</b> gtcatcatatgtattcagga   |
| 3114  | 3154 | 0.41  | gattttccatgttgcccagc | <b>ag</b> gaggctgaaatgttcaaacg   |
| 3225  | 3265 | 0.95  | ccccatcaaggctcttttc  | <b>ag</b> attgatgaatttgtccacac   |
| 4005  | 4045 | 0.80  | ccaaatggaattttctcttc | <b>ag</b> agttcagaattttcagatac   |
| 4793  | 4833 | 0.58  | taaaattttgtgtttctta  | <b>ag</b> atcaaatacatataggttaact |
| 5002  | 5042 | 0.80  | tttattttttctaaagttcc | <b>ag</b> aataatagtgtcattattat   |
| 5590  | 5630 | 0.94  | aaaatatctgtttctctgc  | <b>ag</b> tttcagctaataattttgag   |

### Donor site predictions for NM\_001134831.2(AHI1):c.2106G>A :

| Start | End | Score | Exon    | Intron           |
|-------|-----|-------|---------|------------------|
| 596   | 610 | 0.99  | tgatgat | <b>gt</b> aagtgc |
| 861   | 875 | 0.62  | cagaaaa | <b>gt</b> gagaag |

|      |      |      |                          |
|------|------|------|--------------------------|
| 1101 | 1115 | 0.42 | gaaacaa <b>gt</b> acattg |
| 1448 | 1462 | 0.89 | cccaatg <b>gt</b> aaaaat |
| 1942 | 1956 | 0.88 | caacact <b>gt</b> acgtaa |
| 1952 | 1966 | 0.79 | cgtaact <b>gt</b> aagagg |
| 2025 | 2039 | 0.97 | gaaaaag <b>gt</b> aaacca |
| 3317 | 3331 | 0.50 | cacagag <b>gt</b> gatacg |
| 3500 | 3514 | 0.90 | ccatcag <b>gt</b> agatac |
| 4486 | 4500 | 0.89 | acctaag <b>gt</b> caggag |
| 4821 | 4835 | 0.60 | catatag <b>gt</b> aacttc |
| 5341 | 5355 | 0.69 | aaaattg <b>gt</b> aaacat |
| 5497 | 5511 | 0.59 | gtgtcag <b>gt</b> acagct |
| 5866 | 5880 | 0.98 | tgacaaa <b>gt</b> aagact |

---

### Acceptor site predictions for NM\_001134831.2(AHI1):c.2106G>A :

| Start | End  | Score | Intron               | Exon                            |
|-------|------|-------|----------------------|---------------------------------|
| 3     | 43   | 0.86  | agagccgcggttgctttc   | <b>ag</b> gacacgggtcgctggcgggt  |
| 140   | 180  | 0.68  | gttctgcgtacccctctcc  | <b>ag</b> tgtcaacctggggctgaatc  |
| 318   | 358  | 0.57  | gtcaatgctttgcattctc  | <b>ag</b> tcctctgcataaagctgaga  |
| 1003  | 1043 | 0.97  | agttgacttactttccctc  | <b>ag</b> atactttattccatgatgac  |
| 1162  | 1202 | 0.90  | cagttagatcagtttcttc  | <b>ag</b> attctcatcaagatgatgaa  |
| 2001  | 2041 | 0.77  | cgctctatgatggctcttc  | <b>ag</b> gaggaaaaaggtaaaccagt  |
| 2605  | 2645 | 0.67  | cactttgttttgatactga  | <b>ag</b> gtcatcatatgtattcagga  |
| 3114  | 3154 | 0.41  | gatttccatggtgcccagc  | <b>ag</b> gaggctgaaatgttcaaacg  |
| 3225  | 3265 | 0.95  | ccccatcaaggctcttttc  | <b>ag</b> attgatgaatttgtccacac  |
| 4005  | 4045 | 0.80  | ccaaatggaatttctcttc  | <b>ag</b> agttcagaattttcagatac  |
| 4793  | 4833 | 0.58  | taaaattttgtgtttctta  | <b>ag</b> atcaaatacatataggtaact |
| 5002  | 5042 | 0.80  | tttattttttctaaagttcc | <b>ag</b> aataatagtgtcattattat  |
| 5590  | 5630 | 0.94  | aaaatatctgtttctctgc  | <b>ag</b> tttcagctaataattttgag  |

---
